# Supplementary material
Source: PubMed Central journal article supplement (PMC3690177)
Supplement: NIHMS101538-supplement-Supplementary_Data.pdf [file NIHMS101538-supplement-Supplementary_Data.pdf]

# Synthesis and characterization of a peripherally restricted CB<sub>1</sub> cannabinoid antagonist, URB447, that reduces feeding and body weight gain in mice

Jesse LoVerme<sup>a</sup>, Andrea Duranti<sup>b</sup>, Andrea Tontini<sup>b</sup>, Gilberto Spadoni<sup>b</sup>, Marco Mor<sup>c</sup>,  
Silvia Rivara<sup>c</sup>, Nephi Stella<sup>d</sup>, Cong Xu<sup>d</sup>, Giorgio Tarzia<sup>b,\*</sup>, Daniele Piomelli<sup>a,e\*</sup>

<sup>a</sup>Department of Pharmacology, 360 MedScience II, University of California, Irvine, CA 92627-4625, USA. <sup>b</sup>Istituto di Chimica Farmaceutica e Tossicologica, Università degli Studi di Urbino "Carlo Bo", Piazza del Rinascimento 6, Urbino 61029, Italy. <sup>c</sup>Dipartimento Farmaceutico, Università degli Studi di Parma, Viale G. P. Usberti 27/A, Parma 43100, Italy. <sup>d</sup>Department of Pharmacology, University of Washington, Seattle, WA98195-7280. <sup>e</sup>Department of Drug Discovery and Development, Italian Institute of Technology, via Morego 30, I-16163 Genova, Italy.

## SUPPLEMENTARY DATA

### Experimental

#### Chemistry

All chemicals were purchased from Sigma-Aldrich or Tocris in the highest quality commercially available. Rimonabant was provided by RBI as part of the Chemical Synthesis Program of the National Institutes of Health (NIH). Solvents were RP grade, unless otherwise indicated. Chromatographic separations were performed on silica gel columns by flash chromatography (Kieselgel 60, 0.040-0.063 mm, Merck). TLC analyses were performed on precoated silica gel on aluminium sheets (Kieselgel 60 F<sub>254</sub>, Merck). Melting points were determined on a Büchi SMP-510, or a Kofler Reichert, capillary melting point apparatus. MS (EI) analyses (70 eV) were recorded with a Fisons Trio 1000 spectrometer. <sup>1</sup>H NMR spectra were recorded on a Bruker AC 200 spectrometer and analyzed using the WIN-NMR software package; chemical shifts were measured by using the central peak of the solvent. IR spectra were obtained on a Shimadzu FT-8300, or a Nicolet Avatar, spectrometer. Elemental analyses were performed on a Carlo Erba analyzer. Fresh drug solutions were prepared immediately before use in a vehicle of 0.9% sterile saline/10% polyethylene glycol (PEG)-400/10% Tween-80.

**General procedure for the synthesis of 1-(4-chlorobenzyl)pyrrole derivatives (2, 7, 8a).** To a stirred, cooled (0 °C) solution (contained in a N<sub>2</sub> atmosphere) of the suitable pyrrole derivative **1**, **5a**, **6** (1 mmol) in dry DMF (2.5 mL), NaH (0.035 g of an 80% mineral oil dispersion; 1.15 mmol) was added with constant stirring that was continued for 0.5 h before addition of the 4-chlorobenzylchloride (0.185 g; 1.15 mmol). After stirring the mixture for 2 h at room temperature a further amount of NaH (0.035 g; 1.15 mmol) and 4-chlorobenzylchloride (0.185 g; 1.15 mmol) were added and the mixture was allowed to react for 4 h (**8a**: 1 h; **2**, **7**: 4 h). CH<sub>2</sub>Cl<sub>2</sub> and H<sub>2</sub>O were then slowly added, the organic layer was separated, washed with H<sub>2</sub>O, dried (Na<sub>2</sub>SO<sub>4</sub>) and concentrated. Purification of the residue by column chromatography (cyclohexane/EtOAc 9:1: **8a**; 8:2: **7**; 7:3: **2**) and recrystallization yielded **2**, **7**, and **8a** as solids.

**1-(4-Chlorobenzyl)-2-methyl-5-phenyl-1H-pyrrole-3-carboxylic acid ethyl ester (2).** White solid. Yield: 48% (0.169 g). Mp 112–114 °C (Et<sub>2</sub>O/petroleum ether). MS (EI): *m/z* 353 (M<sup>+</sup>), 125 (100). <sup>1</sup>H NMR (CDCl<sub>3</sub>): δ 1.37 (t, 3H); 2.46 (s, 3H); 4.31 (q, 2H); 5.10 (s, 2H); 6.69 (s, 1H); 6.84 (m, 2H); 7.24 (m, 7H) ppm. IR (neat): 3063, 2976, 2929 cm<sup>-1</sup>.

**{1-(4-chlorobenzyl)-4-[(4-chlorobenzylidene)amino]-2-methyl-5-phenyl-1H-pyrrol-3-yl}(phenyl) methanone (7).** Yellow amorphous solid. Yield: 78% (0.408 g). MS (EI): *m/z* 523 (M<sup>+</sup>), 77 (100). <sup>1</sup>H NMR (CDCl<sub>3</sub>): δ 2.34 (s, 3H); 5.15 (s, 2H); 6.94 (d, 2H); 7.18–7.36 (m, 14H); 7.83 (m, 3H) ppm.

**[1-(4-Chlorobenzyl)-2-methyl-5-phenyl-1H-pyrrole-3-yl](phenyl)methanone (8a).** White crystals. Yield: 70% (0.270 g). Mp 109–110 °C (Et<sub>2</sub>O/petroleum ether). MS (EI): *m/z* 385 (M<sup>+</sup>), 125 (100). <sup>1</sup>H NMR (CDCl<sub>3</sub>): δ 2.52 (s, 3H); 5.16 (s, 2H); 6.51 (s, 1H); 6.90 (d, 2H); 7.23–7.51 (m, 10H); 7.88 (m, 2H) ppm. IR (nujol): 1635 cm<sup>-1</sup>. Anal. calcd for C<sub>25</sub>H<sub>20</sub>ClNO·0.25H<sub>2</sub>O (390.39): C, 76.92; H, 5.29; N, 3.59. Found: C, 77.13; H, 5.10; N, 3.48.

**Synthesis of 1-(4-chlorobenzyl)-2-methyl-5-phenyl-1H-pyrrole-3-carboxylic acid.** To a solution of **2** (0.118 mg; 0.33 mmol) in MeOH (2.7 mL) and H<sub>2</sub>O (0.66 mL), was added LiOH·H<sub>2</sub>O. After

refluxing the mixture for 14 h, the solvent was evaporated. The residue was cooled, neutralized with 2N HCl and extracted with EtOAc. The organic layer was washed with H<sub>2</sub>O, dried (Na<sub>2</sub>SO<sub>4</sub>) and concentrated. Purification of the residue by crystallization gave the desired compound as a white solid. Yield 90% (0.097 g). Mp 185–186 °C (EtOAc/petroleum ether). MS (EI): *m/z* 326 (M<sup>+</sup>), 125 (100). <sup>1</sup>H NMR (CDCl<sub>3</sub>): δ 2.48 (s, 3H); 5.11 (s, 2H); 6.74 (s, 1H); 6.85 (d, 2H); 7.24–7.35 (m, 7H) ppm. IR (nujol): 1662 cm<sup>-1</sup>.

**Synthesis of 3-(*N*-substituted)carbamoyl-1-(4-chlorobenzyl)-2-methyl-5-phenylpyrroles (3a–c).**

To a stirred, cooled (0 °C) solution of the above carboxylic acid (0.108 g; 0.33 mmol) in dry DMF (1.2 mL) under N<sub>2</sub> atmosphere, (COCl)<sub>2</sub> (0.169 g; 0.12 mL; 1.33 mmol) was added. After stirring the mixture for 6 h at room temperature, the solvent and the excess of oxalyl chloride were evaporated. Dry CH<sub>2</sub>Cl<sub>2</sub> was added and distilled away twice in order to remove the last traces of oxalyl chloride. The residue was dissolved in dry CH<sub>2</sub>Cl<sub>2</sub> (2.5 mL) and added dropwise to a solution of the appropriate amine (0.54 mmol; 0.45 mmol in the case of **3c**) and TEA (0.055 mg; 0.076 mL; 0.54 mmol) in dry CH<sub>2</sub>Cl<sub>2</sub> (3.3 mL). The mixture was stirred 14 h at room temperature, then was washed with H<sub>2</sub>O, 2N NaOH, 2N HCl and H<sub>2</sub>O, dried (Na<sub>2</sub>SO<sub>4</sub>) and concentrated. Purification of the residue by column chromatography (cyclohexane/EtOAc 7:3: **3c**; 1:1: **3a**) and recrystallization yielded **3a** and **3c** as solids. In the case of **3b** the residue was purified directly by crystallization.

**1-(4-Chlorobenzyl)-2-methyl-5-phenyl-1*H*-pyrrole-3-carboxylic acid piperidin-1-ylamide (3a).**

White crystals. Yield: 74% (0.099 g). Mp 189–192 °C (CH<sub>2</sub>Cl<sub>2</sub>/petroleum ether). MS (EI): *m/z* 407 (M<sup>+</sup>), 308 (100). <sup>1</sup>H NMR (CDCl<sub>3</sub>): δ 1.44–1.78 (m, 6H); 2.47 (s, 3H); 2.86 (m, 4H); 5.08 (s, 2H); 6.32 (br d, 1H); 6.52 (s, 1H); 6.84 (d, 2H); 7.20–7.35 (m, 7H) ppm. IR (nujol): 3244, 1638 cm<sup>-1</sup>. Anal. calcd for C<sub>24</sub>H<sub>26</sub>ClN<sub>3</sub>O (407.94): C, 70.66; H, 6.42; N, 10.30. Found: C, 70.35; H, 6.40; N, 10.22.

**1-(4-Chlorobenzyl)-2-methyl-5-phenyl-1*H*-pyrrole-3-carboxylic acid bicyclo[2.2.1]-hept-2-**

**ylamide (3b).** White solid. Yield: 78% (0.108 g). Mp 214–215 °C (EtOAc). MS (EI): *m/z* 418 (M<sup>+</sup>), 125 (100). <sup>1</sup>H NMR (CDCl<sub>3</sub>): δ 1.15–1.53 (m, 7H); 1.83–1.94 (m, 1H); 2.31 (m, 2H); 2.48 (s, 3H); 3.89

(m, 1H); 5.08 (s, 2H); 5.64 (br d, 1H); 6.30 (s, 1H); 6.84 (d, 2H); 7.21–7.29 (m, 7H) ppm. IR (nujol): 3325, 1622  $\text{cm}^{-1}$ . Anal. calcd for  $\text{C}_{26}\text{H}_{27}\text{ClN}_2\text{O}$  (418.96): C, 74.54; H, 6.50; N, 6.69. Found: C, 74.23; H, 6.37; N, 6.53.

**1-(4-Chlorobenzyl)-2-methyl-5-phenyl-1*H*-pyrrole-3-carboxylic acid adamantan-2-ylamide (3c).**

White solid. Yield: 59% (0.089 g). Mp 190–192 °C (EtOAc/petroleum ether). MS (EI):  $m/z$  458 ( $\text{M}^+$ ), 125 (100).  $^1\text{H}$  NMR ( $\text{CDCl}_3$ ):  $\delta$  1.72–2.05 (m, 14H); 2.49 (s, 3H); 4.24 (br d, 1H); 5.09 (s, 2H); 6.18 (br d, 1H); 6.37 (s, 1H); 6.85 (d, 2H); 7.22–7.34 (m, 7H) ppm. IR (nujol): 3334, 1616  $\text{cm}^{-1}$ . Anal. calcd for  $\text{C}_{29}\text{H}_{31}\text{ClN}_2\text{O}$  (459.02): C, 74.01; H, 7.01; N, 5.57. Found: C, 74.37; H, 6.92; N, 5.67.

**Synthesis of 4-bromo-1-(4-chlorobenzyl)-2-methyl-5-phenyl-1*H*-pyrrole-3-carboxylic acid adamantan-2-ylamide (4).** To a solution of **3c** (0.069 g; 0.15 mmol) in dioxane (0.6 mL) and  $\text{CH}_3\text{COOH}$  (0.3 mL), *N*-bromosuccinimide (0.027 g; 0.15 mmol) was added portionwise and the reactants were allowed to react at room temperature for 2 h. The mixture was then poured onto a cooled (0 °C) 2N NaOH solution, and extracted with  $\text{CH}_2\text{Cl}_2$ . The combined organic layers were washed with 2N HCl and brine, dried ( $\text{Na}_2\text{SO}_4$ ), and concentrated. Purification of the residue by column chromatography ( $\text{CH}_2\text{Cl}_2$ ) and recrystallization gave **4** as a white solid. Yield: 45% (0.036 g). Mp 155–157 °C ( $\text{Et}_2\text{O}$ /petroleum ether). MS (EI):  $m/z$  538 ( $\text{M}^+$ ), 125 (100).  $^1\text{H}$  NMR ( $\text{CDCl}_3$ ):  $\delta$  0.83–2.04 (m, 15H); 2.51 (s, 3H); 4.30 (br d, 1H); 4.96 (s, 2H); 6.78 (d, 2H); 7.12–7.35 (m, 7H) ppm. IR (nujol): 3428, 1647  $\text{cm}^{-1}$ . Anal. calcd for  $\text{C}_{29}\text{H}_{30}\text{BrClN}_2\text{O}$  (537.92): C, 63.69; H, 5.71; N, 5.12. Found: C, 63.66; H, 5.54; N, 4.97.

**Synthesis of {4-[(4-chlorobenzylidene)amino]-2-methyl-5-phenyl-1*H*-pyrrol-3-yl}(phenyl) methanone (6).** To a stirred suspension of **2** (0.574 g; 2 mmol) in toluene (9 mL), 4-chlorobenzaldehyde (0.281 g; 2 mmol) and a catalytic amount of *p*-toluenesulphonic acid were added. The mixture was refluxed in a Dean-Stark apparatus for 2 h and then concentrated. Purification of the residue by column chromatography (cyclohexane/EtOAc 6:4) gave **6** as a yellow solid. Yield 65% (0.528 g). MS (EI):  $m/z$  406 ( $\text{M}^+$ ), 301 (100).

### **[<sup>35</sup>S]GTPγS and receptor binding assays**

CB<sub>1</sub> and CB<sub>2</sub> binding assays were performed on rat cerebellar membranes or in CHO-K1 cells overexpressing CB<sub>2</sub> receptors (Receptor Biology, Beltsville, Maryland), respectively. Binding studies were performed at 25 °C with 20 μg of receptor protein in a 20 mM HEPES/1mM MgCl (pH = 7.4) buffer along with [<sup>3</sup>H]WIN-55212-2 (Perkin-Elmer, 40-60 Ci/mmol, 10 nM) at a concentration of 10 nM and test compounds at various concentrations. Final assay volume was 0.5 mL and the incubation time was 20 min. Receptor-bound [<sup>3</sup>H]WIN-55212-2 was separated from free [<sup>3</sup>H]WIN-55212-2 by filtration. The filter paper was washed twice with 0.2 mL of cold assay buffer and radioactivity measured by liquid scintillation counting.

GTPγS binding reactions were conducted on rat cerebellar membranes (20 μg) in the presence of various concentrations of test compounds for 90 min at 30 °C with 0.05 nM of [<sup>35</sup>S]GTPγS (New England Nuclear, Boston, Massachusetts, specific activity of 1200 Ci/mmol) in 20 mM Tris pH 7.4, 5 mM MgCl<sub>2</sub>, 0.1 M NaCl, 0.5 M EGTA, 30 μM GDP, 3 mU·mL<sup>-1</sup> adenosine deaminase, 0.02% BSA and 50 μM phenylmethylsulphonyl fluoride at a total reaction volume of 50 μL. Each assay was conducted in the presence or absence of 10 μM cold WIN-55212-2. Reactions were stopped by centrifugation at 4 °C and the resulting supernatants aspirated, followed by washing of the pellet with 1 mL cold buffer. Membrane bound [<sup>35</sup>S]GTPγS was measured in the pellets by liquid scintillation counting.

Membranes were prepared from freshly dissected rat cerebella. Tissues were homogenized in 20 mM Tris (pH 7.5) containing 0.32 M sucrose, followed by centrifugation at 1000 g for 10 min at 4 °C. The resulting pellet was discarded and the supernatant centrifuged at 27,000 g for 30 min at 4 °C. The supernatant was aspirated and the pellet resuspended in 50 mM Tris (pH 7.5). A Bradford assay was used to measure protein concentration.

### **cAMP quantification**

HEK cells stably expressing mouse CB<sub>2</sub> were rinsed once with HEPES buffer (15 min), pre-incubated in HEPES buffer plus IBMX (10 mM, 15 min) and incubated in HEPES plus IBMX with or without isoproterenol (10 μM, 15 min). These steps were performed at 37 °C in a shaking water bath. Cannabinoids were added in both preincubation and incubation. Cells were then lysed with water containing HEPES (20 mM), followed by sonication on ice. cAMP levels in homogenates were quantified using a cAMP [<sup>125</sup>I] radioimmunoassay kit (PerkinElmer NEK033) according to manufacture's instructions.

### **Animals**

All procedures met NIH guidelines for the care and use of laboratory animals. Male Swiss mice, weighing 20-25 g were obtained from Charles River (Wilmington, Massachusetts). Genetically obese mice, weighing 40-45 g (B6.V-Lep<sup>ob</sup>/J) were obtained from Jackson Labs (Bar Harbor, Maine). All animals were maintained on a 12-h/12-h light/dark cycle with free access to water and chow (RMH 2500, Prolab, Framingham, Massachusetts). For blood and tissue collection animals were anaesthetized with halothane and blood was collected by cardiac puncture. Briefly, blood was collected by inserting a syringe, fitted with a 25.5 gauge needle into the right ventricle of anaesthetized mice. 500 μL of blood was withdrawn from the heart and placed into a glass tube containing EDTA (7.2 mg). Plasma was isolated by centrifugation. Tissues were snap-frozen in liquid N<sub>2</sub> and stored at -80 °C.

### **Feeding analyses**

Food intake was recorded with an automated system (Scipro, New York, NY), consisting of 24 individually housed cages containing feeding sensors and light beams for motor activity. Chow was accessible to mice through a wire grating at the bottom of a basket suspended from a calibrated sensor. Each time food was removed, the computer recorded the quantity removed. Weight variations in the baskets were monitored every second. Animals were habituated to the feeding/motor cages for 4 days

prior to the experiment. The animals were injected with vehicle or drugs i.p. min before the start of the 12 h dark cycle, the time at which monitoring was initiated. Food intake was normalized to body weight in kg. Recorded data were analyzed as food ingested per kg body weight across the test period.

### **Motor activity**

Motor activity was determined as the number of light beam interruptions projecting across each cage that the animals interrupted. Motor data was collected automatically by the same cages used for the feeding analyses simultaneously with the feeding measurements (Scipro, New York, NY).

### **Formalin pain assay**

Formalin (5% formaldehyde in a vehicle of 0.9% sterile saline/5% PEG-400/5% Tween-80, 10  $\mu$ L) was injected into the plantar surface of mice using a 27-gauge needle fitted to a microsyringe. Vehicle or (*R*)-methanandamide was dissolved in the formalin solution. Following injections, animals were immediately transferred to a transparent observation chamber where pain behavior (time spent licking and biting the injected paw) was continuously monitored for 45 min (phase-I: 0-15 min; phase-II: 15-45 min) by an observer blind to the treatments. Antagonists were administered intraperitoneally 30 minutes before formalin.

### **Hypothermia**

Body temperature was determined using a digital thermometer coupled to a mouse rectal probe (Stoelting, Wood Dale, Illinois). Results are expressed as change in body temperature from baseline.

### **Catalepsy**

Catalepsy was determined by an observer blind to the treatment as the total time spent cataleptic during a 3-min observation period using a ring apparatus previously described.<sup>1</sup>

### **LC/MS analyses**

Analytes were extracted from blood (0.5 mL total volume) and tissue homogenates (100-200 mg) by the addition and subsequent mixing in CH<sub>3</sub>OH:CHCl<sub>3</sub>:H<sub>2</sub>O (1:2:1 mL). Following, centrifugation the organic layer was aspirated off, transferred to new vials, and evaporated under a stream of N<sub>2</sub>. Analytes were resuspended in 100 µL of CH<sub>3</sub>OH:CHCl<sub>3</sub> (1:1) for LC/MS analyses. URB447 was quantified using an Agilent model #1100-high performance liquid chromatography (HPLC) system coupled to an Agilent model #1946A-mass spectrometer (MS) equipped with an electrospray ionization (ESI) interface. URB447 was separated on an Agilent Zorbax SB-CN (2.1 x 150 mm ID, 5 µm) column. A solvent gradient of H<sub>2</sub>O:MeOH (30:70%) (containing 0.25% CH<sub>3</sub>COOH and 5 mM CH<sub>3</sub>COONH<sub>4</sub>) was used at a flow rate of 0.4 mL/min. The solvent gradient was as follows: 0.0-5.0 min, 30% H<sub>2</sub>O; 5.0-5.1 min, 20% H<sub>2</sub>O; 5.10-6.00 min, 0% H<sub>2</sub>O. MS detection was performed in the positive mode and the capillary voltage was set at 3 kV. N<sub>2</sub> was used as the drying gas at a flow rate of 13 L/min at 350 °C. Nebulizer pressure was set to 60 PSI. Rimonabant (500 pmol/ sample) was used as an internal standard to quantify the recovery of URB447 during the extraction process by adding rimonabant to the CH<sub>3</sub>OH at the start of the lipid extraction. Calibration curves were established for both URB447 and rimonabant. The molecular ion used to quantify URB447 was m/z = 401 [M+H<sup>+</sup>] and for rimonabant, m/z = 463 [M+H<sup>+</sup>]. These ions were monitored in selected ion-monitoring (SIM) mode.

### **Statistical analyses**

Graphpad Prism was used to calculate statistical significance by determining P values using either Student's t-test, ANOVA followed by a Tukey's post-hoc test, or 2-WAY repeated measures ANOVA followed by a Bonferroni post-hoc test where appropriate.

### **References and notes**

1. Pertwee, R. G. *Br. J. Pharmacol.* **1972**, *46*, 753.
